# Supplementary material for: Comparison of glycosyl donors: a supramer approach
Source: publisher site journal article supplement (doi:10.3762/bjoc.20.18), 2024-01-31
Supplement: Additional file 2 [file checkCIF_PLATON report_PDF.pdf › checkCIF_PLATON report_PDF.pdf]

No syntax errors found.  
Please wait while processing ....

[CIF dictionary](#)  
[Interpreting this report](#)

## Datablock: sads\_h

|                        |                                                                 |                                    |
|------------------------|-----------------------------------------------------------------|------------------------------------|
| Bond precision:        | C-C = 0.0124 Å                                                  | Wavelength=1.54178                 |
| Cell:                  | a=22.9311(10) b=22.9311(10) c=27.2831(12)                       |                                    |
|                        | alpha=90 beta=90 gamma=120                                      |                                    |
| Temperature: 120 K     |                                                                 |                                    |
|                        | Calculated                                                      | Reported                           |
| Volume                 | 12424.4(14)                                                     | 12424.4(12)                        |
| Space group            | P 61                                                            | P 61                               |
| Hall group             | P 61                                                            | P 61                               |
| Moiety formula         | 2(C20 H21 Cl2 F3 N O8 S), 4(C22 H24 Cl2 F3 N O10 S), 2(C2 H3 O2 | 6(C22 H24 Cl2 F3 N O10 S), 3(H2 O) |
| Sum formula            | C132 H150 Cl12 F18 N6 O63 S6                                    | C132 H150 Cl12 F18 N6 O63 S6       |
| Mr                     | 3788.22                                                         | 3788.23                            |
| Dx, g cm <sup>-3</sup> | 1.519                                                           | 1.519                              |
| Z                      | 3                                                               | 3                                  |
| Mu (mm <sup>-1</sup> ) | 3.521                                                           | 3.521                              |
| F000                   | 5849.8                                                          | 5850.0                             |
| F000'                  | 5889.49                                                         |                                    |
| h,k,lmax               | 28,28,33                                                        | 27,27,33                           |
| Nref                   | 16576[ 8473]                                                    | 15162                              |
| Tmin,Tmax              | 0.400,0.348                                                     | 0.535,0.745                        |
| Tmin'                  | 0.302                                                           |                                    |
| Correction method=     | # Reported T Limits: Tmin=0.535 Tmax=0.745                      |                                    |
| AbsCorr =              | MULTI-SCAN                                                      |                                    |
| Data completeness=     | 1.79/0.91                                                       | Theta(max)= 73.026                 |
| R(reflections)=        | 0.0531( 11483)                                                  | wR2(reflections)= 0.1498( 15162)   |
| S =                    | 1.064                                                           | Npar= 1439                         |

The following ALERTS were generated. Each ALERT has the format  
[test-name\\_ALERT\\_alert-type\\_alert-level](#).  
Click on the hyperlinks for more details of the test.

### Alert level A

[PLAT430\\_ALERT\\_2\\_A](#) Short Inter D...A Contact S13C ..011Z 2.78 Ang.

**Author Response: This is actually an intramolecular contact.**

### Alert level B

[PLAT340\\_ALERT\\_3\\_B](#) Low Bond Precision on C-C Bonds ..... 0.01235 Ang.

### Alert level C

[PLAT089\\_ALERT\\_3\\_C](#) Poor Data / Parameter Ratio (Zmax < 18) ..... 5.71 Note  
[PLAT215\\_ALERT\\_3\\_C](#) Disordered Cl4 has ADP max/min Ratio ..... 3.3 Note  
[PLAT220\\_ALERT\\_2\\_C](#) Non-Solvent Resd 1 C Ueq(max)/Ueq(min) Range 3.5 Ratio  
[PLAT222\\_ALERT\\_3\\_C](#) Non-Solv. Resd 1 H Uiso(max)/Uiso(min) Range 10.0 Ratio  
[PLAT234\\_ALERT\\_4\\_C](#) Large Hirshfeld Difference S13C --C2D 0.16 Ang.  
[PLAT234\\_ALERT\\_4\\_C](#) Large Hirshfeld Difference F29B --C28B 0.20 Ang.  
[PLAT242\\_ALERT\\_2\\_C](#) Low 'MainMol' Ueq as Compared to Neighbors of C14C Check  
[PLAT245\\_ALERT\\_2\\_C](#) U(iso) H25C Smaller than U(eq) N25C by 0.031 Ang\*\*2

#### And 3 other PLAT245 Alerts

More ...

[PLAT331\\_ALERT\\_2\\_C](#) Small Average Phenyl C-C Dist C14C -C19C 1.37 Ang.  
[PLAT411\\_ALERT\\_2\\_C](#) Short Inter H...H Contact H18C ..H16Z 2.11 Ang.  
[PLAT413\\_ALERT\\_2\\_C](#) Short Inter XH3 ..XHn H12H ..H12C 2.07 Ang.

#### And 2 other PLAT413 Alerts

More ...

[PLAT414\\_ALERT\\_2\\_C](#) Short Intra D-H...H-X H8D ..H34C 1.91 Ang.  
[PLAT430\\_ALERT\\_2\\_C](#) Short Inter D...A Contact O22B ..01W 2.88 Ang.

**Author Response: This is actually an intramolecular contact.**

[PLAT911\\_ALERT\\_3\\_C](#) Missing FCF Refl Between Thmin & STh/L= 0.600 16 Report  
[PLAT915\\_ALERT\\_3\\_C](#) No Flack x Check Done: Low Friedel Pair Coverage 86 %

### Alert level G

[PLAT002\\_ALERT\\_2\\_G](#) Number of Distance or Angle Restraints on AtSite 83 Note

|                                    |                                                                           |              |
|------------------------------------|---------------------------------------------------------------------------|--------------|
| <a href="#">PLAT003_ALERT_2_G</a>  | Number of Uiso or Uij Restrained non-H Atoms ...                          | 28 Report    |
| <a href="#">PLAT042_ALERT_1_G</a>  | Calc. and Reported MoietyFormula Strings Differ                           | Please Check |
| <a href="#">PLAT068_ALERT_1_G</a>  | Reported F000 Differs from Calcd (or Missing)...                          | Please Check |
| <a href="#">PLAT083_ALERT_2_G</a>  | SHELXL Second Parameter in WGHT Unusually Large                           | 9.17 Why ?   |
| <a href="#">PLAT152_ALERT_1_G</a>  | The Supplied and Calc. Volume s.u. Differ by ...                          | 2 Units      |
| <a href="#">PLAT171_ALERT_4_G</a>  | The CIF-Embedded .res File Contains EADP Records                          | 13 Report    |
| <a href="#">PLAT172_ALERT_4_G</a>  | The CIF-Embedded .res File Contains DFIX Records                          | 29 Report    |
| <a href="#">PLAT176_ALERT_4_G</a>  | The CIF-Embedded .res File Contains SADI Records                          | 4 Report     |
| <a href="#">PLAT178_ALERT_4_G</a>  | The CIF-Embedded .res File Contains SIMU Records                          | 11 Report    |
| <a href="#">PLAT230_ALERT_2_G</a>  | Hirshfeld Test Diff for F26Z --C28A .                                     | 6.2 s.u.     |
| <a href="#">PLAT230_ALERT_2_G</a>  | Hirshfeld Test Diff for F29A --C28A .                                     | 5.2 s.u.     |
| <a href="#">PLAT242_ALERT_2_G</a>  | Low 'MainMol' Ueq as Compared to Neighbors of                             | C28B Check   |
| <a href="#">PLAT242_ALERT_2_G</a>  | Low 'MainMol' Ueq as Compared to Neighbors of                             | C28A Check   |
| <a href="#">PLAT300_ALERT_4_G</a>  | Atom Site Occupancy of Cl2 Constrained at                                 | 0.5 Check    |
| <b>And 83 other PLAT300 Alerts</b> |                                                                           |              |
| More ...                           |                                                                           |              |
| <a href="#">PLAT301_ALERT_3_G</a>  | Main Residue Disorder .....(Resd 1 )                                      | 77% Note     |
| <b>And 2 other PLAT301 Alerts</b>  |                                                                           |              |
| More ...                           |                                                                           |              |
| <a href="#">PLAT302_ALERT_4_G</a>  | Anion/Solvent/Minor-Residue Disorder (Resd 4 )                            | 100% Note    |
| <b>And 4 other PLAT302 Alerts</b>  |                                                                           |              |
| More ...                           |                                                                           |              |
| <a href="#">PLAT304_ALERT_4_G</a>  | Non-Integer Number of Atoms in ..... Resd 4                               | 2.28 Check   |
| <b>And 6 other PLAT304 Alerts</b>  |                                                                           |              |
| More ...                           |                                                                           |              |
| <a href="#">PLAT311_ALERT_2_G</a>  | Isolated Disordered Oxygen Atom (No H's ?) .....                          | 01W Check    |
| <a href="#">PLAT311_ALERT_2_G</a>  | Isolated Disordered Oxygen Atom (No H's ?) .....                          | 02W Check    |
| <a href="#">PLAT432_ALERT_2_G</a>  | Short Inter X...Y Contact S13C ..C1Z                                      | 2.44 Ang.    |
| <b>And 10 other PLAT432 Alerts</b> |                                                                           |              |
| More ...                           |                                                                           |              |
| <a href="#">PLAT720_ALERT_4_G</a>  | Number of Unusual/Non-Standard Labels .....                               | 20 Note      |
| <a href="#">PLAT790_ALERT_4_G</a>  | Centre of Gravity not Within Unit Cell: Resd. #<br>C22 H24 Cl2 F3 N O10 S | 2 Note       |
| <a href="#">PLAT790_ALERT_4_G</a>  | Centre of Gravity not Within Unit Cell: Resd. #<br>C22 H24 Cl2 F3 N O10 S | 3 Note       |
| <a href="#">PLAT790_ALERT_4_G</a>  | Centre of Gravity not Within Unit Cell: Resd. #<br>C2 H3 O2               | 4 Note       |
| <a href="#">PLAT790_ALERT_4_G</a>  | Centre of Gravity not Within Unit Cell: Resd. #<br>C2 H3 O2               | 5 Note       |
| <a href="#">PLAT790_ALERT_4_G</a>  | Centre of Gravity not Within Unit Cell: Resd. #<br>C2 H3 O2               | 6 Note       |
| <a href="#">PLAT790_ALERT_4_G</a>  | Centre of Gravity not Within Unit Cell: Resd. #<br>H2 O                   | 7 Note       |
| <a href="#">PLAT790_ALERT_4_G</a>  | Centre of Gravity not Within Unit Cell: Resd. #<br>O                      | 8 Note       |
| <a href="#">PLAT790_ALERT_4_G</a>  | Centre of Gravity not Within Unit Cell: Resd. #<br>O                      | 9 Note       |
| <a href="#">PLAT790_ALERT_4_G</a>  | Centre of Gravity not Within Unit Cell: Resd. #<br>H                      | 10 Note      |
| <a href="#">PLAT790_ALERT_4_G</a>  | Centre of Gravity not Within Unit Cell: Resd. #<br>H                      | 11 Note      |
| <a href="#">PLAT791_ALERT_4_G</a>  | Model has Chirality at C2A (Chiral SPGR)                                  | R Verify     |
| <b>And 21 other PLAT791 Alerts</b> |                                                                           |              |
| More ...                           |                                                                           |              |
| <a href="#">PLAT811_ALERT_5_G</a>  | No ADDSYM Analysis: Too Many Excluded Atoms ....                          | ! Info       |
| <a href="#">PLAT860_ALERT_3_G</a>  | Number of Least-Squares Restraints .....                                  | 437 Note     |
| <a href="#">PLAT912_ALERT_4_G</a>  | Missing # of FCF Reflections Above STh/L= 0.600                           | 193 Note     |
| <a href="#">PLAT978_ALERT_2_G</a>  | Number C-C Bonds with Positive Residual Density.                          | 1 Info       |

1 **ALERT level A** = Most likely a serious problem - resolve or explain  
 1 **ALERT level B** = A potentially serious problem, consider carefully  
 20 **ALERT level C** = Check. Ensure it is not caused by an omission or oversight  
 163 **ALERT level G** = General information/check it is not something unexpected

3 **ALERT type 1** CIF construction/syntax error, inconsistent or missing data  
 35 **ALERT type 2** Indicator that the structure model may be wrong or deficient  
 10 **ALERT type 3** Indicator that the structure quality may be low  
 136 **ALERT type 4** Improvement, methodology, query or suggestion  
 1 **ALERT type 5** Informative message, check

It is advisable to attempt to resolve as many as possible of the alerts in all categories. Often the minor alerts point to easily fixed oversights, errors and omissions in your CIF or refinement strategy, so attention to these fine details can be worthwhile. In order to resolve some of the more serious problems it may be necessary to carry out additional measurements or structure refinements. However, the purpose of your study may justify the reported deviations and the more serious of these should

normally be commented upon in the discussion or experimental section of a paper or in the "special\_details" fields of the CIF. checkCIF was carefully designed to identify outliers and unusual parameters, but every test has its limitations and alerts that are not important in a particular case may appear. Conversely, the absence of alerts does not guarantee there are no aspects of the results needing attention. It is up to the individual to critically assess their own results and, if necessary, seek expert advice.

### Publication of your CIF in IUCr journals

A basic structural check has been run on your CIF. These basic checks will be run on all CIFs submitted for publication in IUCr journals (*Acta Crystallographica*, *Journal of Applied Crystallography*, *Journal of Synchrotron Radiation*); however, if you intend to submit to *Acta Crystallographica Section C* or *E* or *IUCrData*, you should make sure that [full publication checks](#) are run on the final version of your CIF prior to submission.

### Publication of your CIF in other journals

Please refer to the *Notes for Authors* of the relevant journal for any special instructions relating to CIF submission.

PLATON version of 23/04/2018; check.def file version of 23/04/2018

### Datablock sads\_h - ellipsoid plot

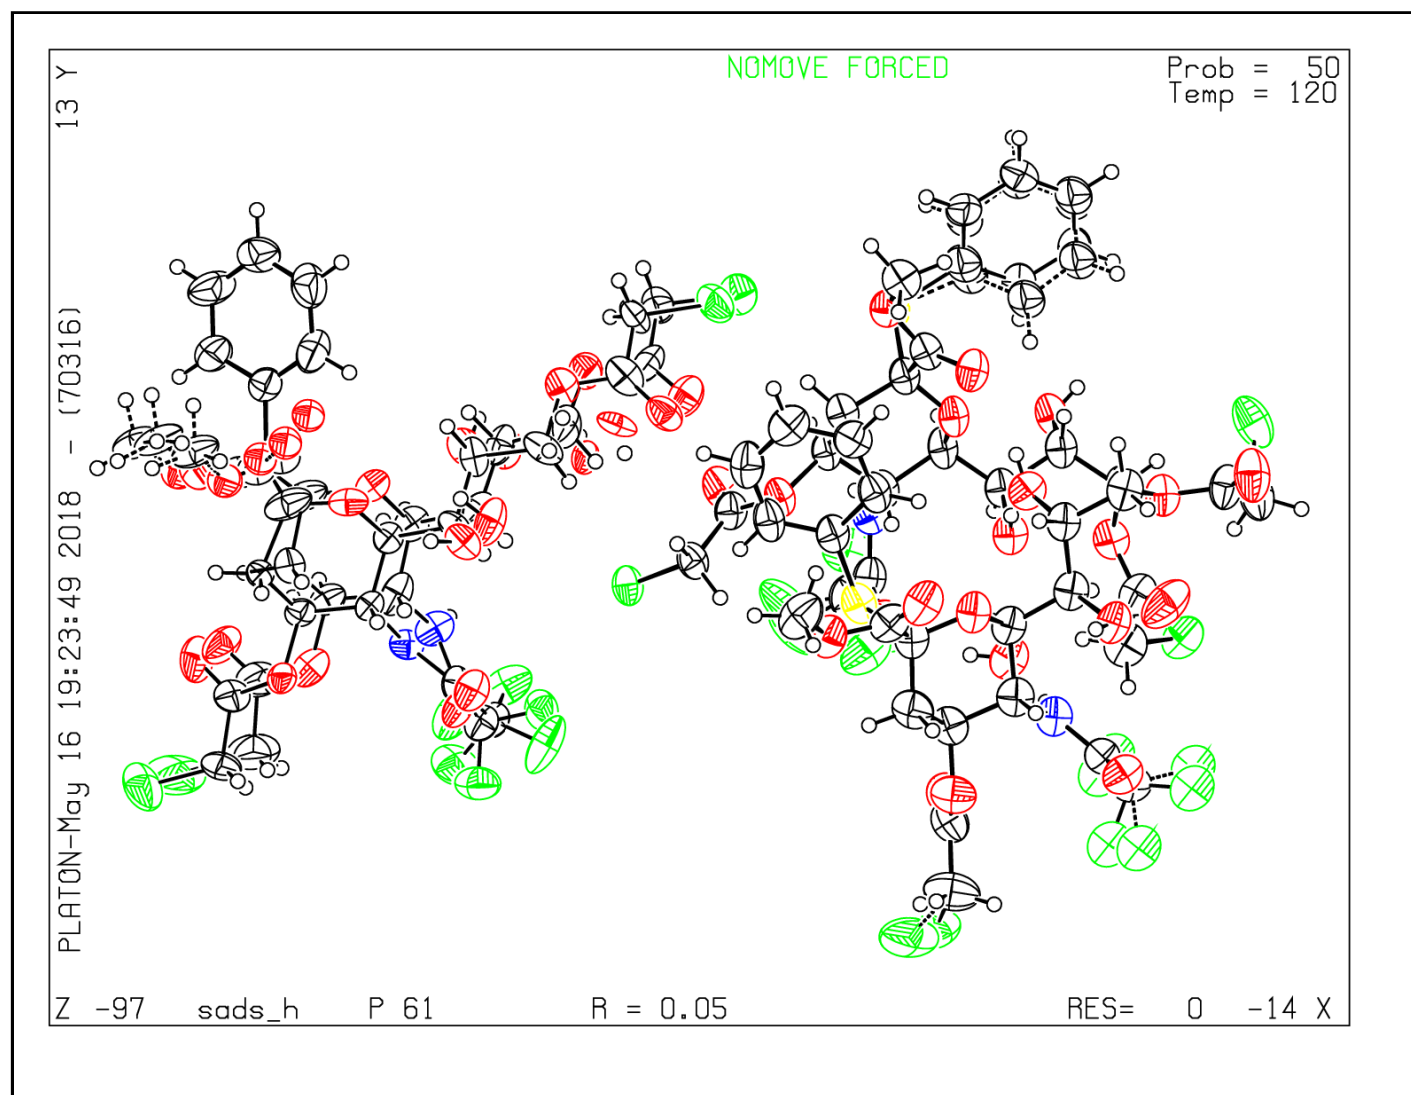

[Download CIF editor \(publCIF\) from the IUCr](#)  
[Download CIF editor \(enCIFer\) from the CCDC](#)  
[Test a new CIF entry.](#)
